# Supplementary material for: c-mycin the hematopoietic lineage is crucial for its angiogenic function in the mouse embryo
Source: Oxford University Press journal article supplement (doi:10.1242/dev.020131), 2008-06-13
Supplement: dev020131-tables1.pdf [file dev020131-tables1.pdf]

**Table S1. Deletion of c-Myc by Tie2-Cre results in embryonic death at 11.5 dpc with anemia**

| Embryonic stage (dpc) | Litters | Mutant embryos |            |                 |             |
|-----------------------|---------|----------------|------------|-----------------|-------------|
|                       |         | Mutant/control | Pale       | Growth retarded | Alive       |
| 8.5                   | 10      | 21/83 (25.3)   | 0/21 (0)   | 0/21 (0)        | 21/21 (100) |
| 9.5                   | 7       | 8/44 (15.4)    | 0/8 (0)    | 0/8 (0)         | 8/8 (100)   |
| 10.5                  | 15      | 34/117 (22.5)  | 32/34 (94) | 19/34 (56)      | 28/34 (18)  |
| 11.5                  | 6       | 7/52 (11.9)    | 7/7 (100)  | 7/7 (100)       | 0/7 (0)     |
| 12.5                  | 4       | 3/33 (9.1)     | 3/3 (100)  | 3/3 (100)       | 0/3 (0)     |

Numbers are given with percentage in parentheses.
